# Supplementary material for: Posterior circulation acute stroke prognosis early CT scores in predicting functional outcomes: A meta-analysis
Source: PubMed Central journal article supplement (PMC7886215; doi:10.1371/journal.pone.0246906), 2021-02-16

# Unfavorable outcome prediction by PC-ASPECTS per score decrease (varied definition of mRS)

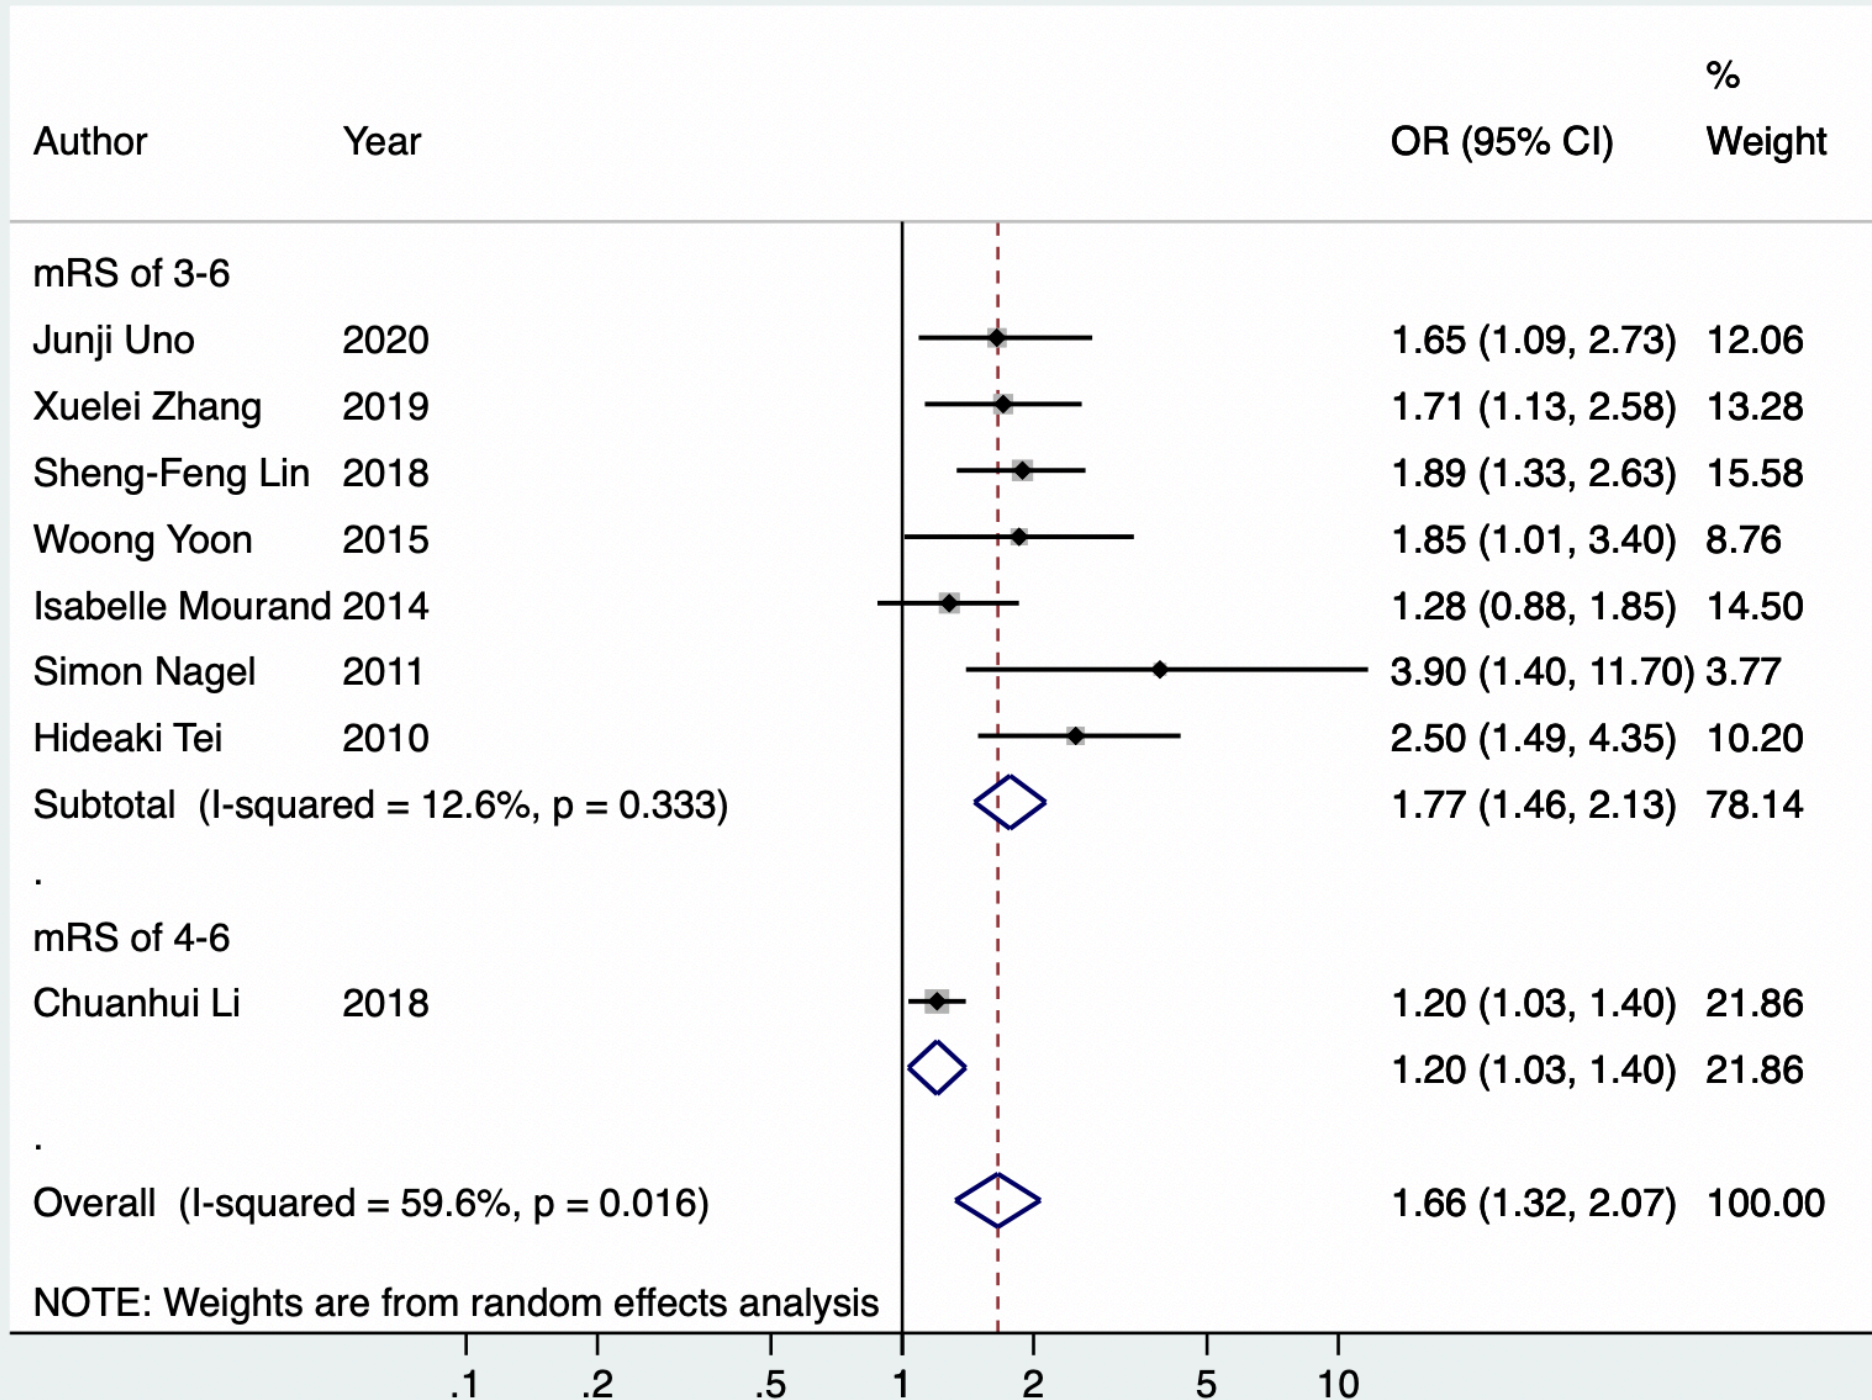

Supplement: pone.0246906.s005.pdf [file pone.0246906.s005.pdf]
