# Supplementary material for: Posterior circulation acute stroke prognosis early CT scores in predicting functional outcomes: A meta-analysis
Source: PubMed Central journal article supplement (PMC7886215; doi:10.1371/journal.pone.0246906), 2021-02-16
Supplement: pone.0246906.s006.pdf [file pone.0246906.s006.pdf]

## Unfavorable outcomes prediction by binary PC-ASPECTS (varied definition of mRS)

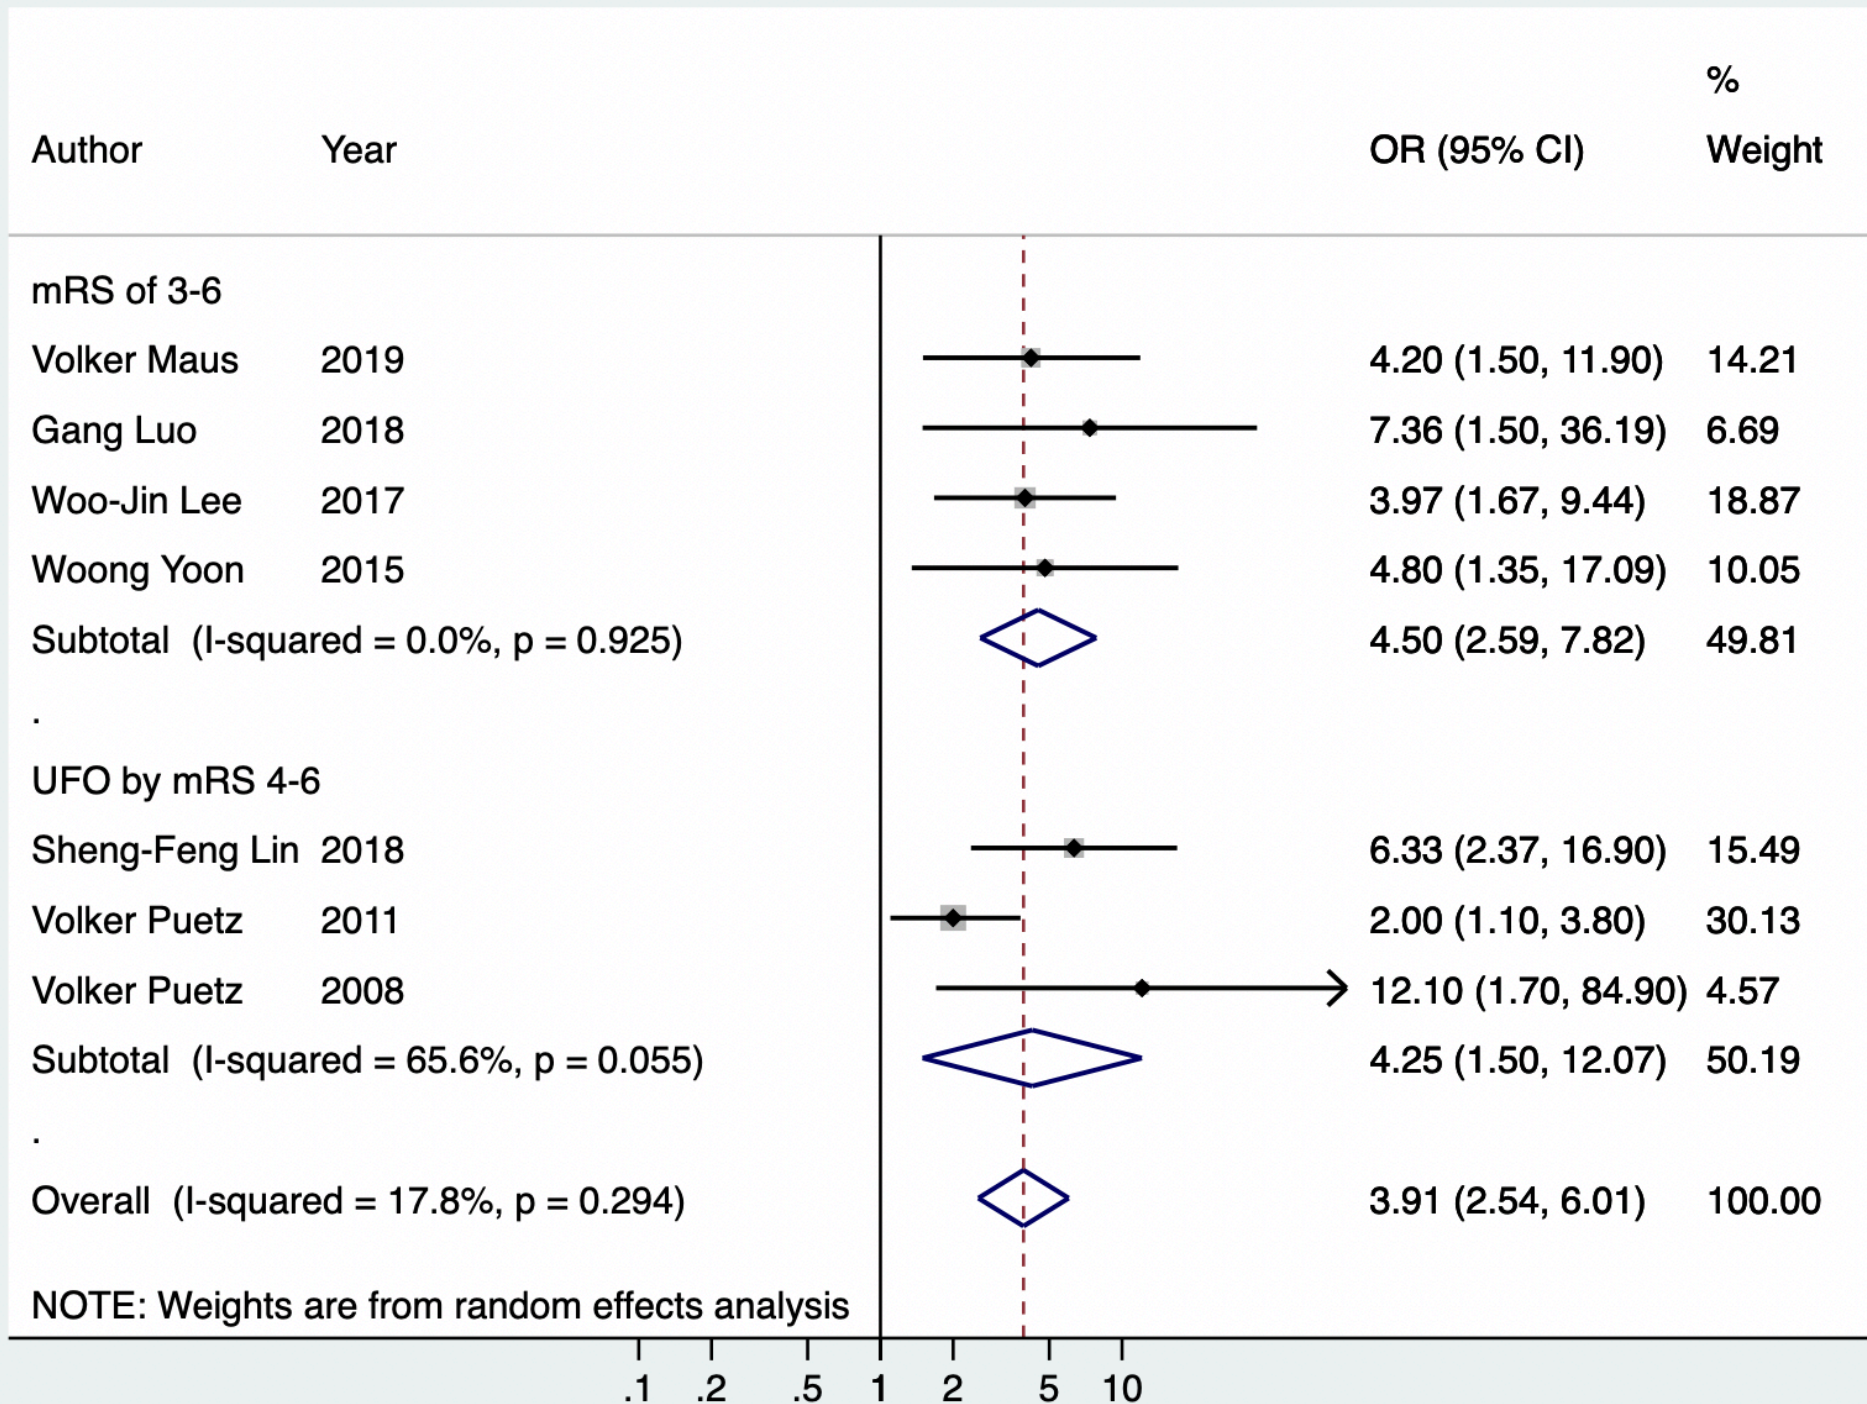

NOTE: Weights are from random effects analysis
