# Supplementary material for: Posterior circulation acute stroke prognosis early CT scores in predicting functional outcomes: A meta-analysis
Source: PubMed Central journal article supplement (PMC7886215; doi:10.1371/journal.pone.0246906), 2021-02-16
Supplement: pone.0246906.s010.pdf [file pone.0246906.s010.pdf]

**S3 Table. Meta-regression of standardized mean difference of PC-ASPECTS between unfavorable and favorable outcomes for patients with intra-arterial endovascular treatment.**

| <b>Variables</b>                        | <b>Coef.</b> | <b>SE</b> | <b>95% CI</b>                              | <b><i>t test</i></b> | <b><i>P value</i></b> |
|-----------------------------------------|--------------|-----------|--------------------------------------------|----------------------|-----------------------|
| Constant                                | 0.319        | 0.946     | -1.789 to 2.427                            | 0.34                 | 0.743                 |
| Imaging modality of CT vs. MRI          | -0.903       | 0.405     | -1.805 to -0.002                           | -2.23                | 0.050*                |
| Definition of UFO by mRS (3-6 vs. 4-6)  | 0.331        | 0.396     | -0.551 to 1.213                            | 0.84                 | 0.422                 |
| REML estimate of between-study variance |              |           | Tau <sup>2</sup> = 0.304                   |                      |                       |
| Number of observation= 13               |              |           | Residual variation I <sup>2</sup> = 71.01% |                      |                       |
|                                         |              |           | Adjusted R <sup>2</sup> = 38.91%           |                      |                       |

Coef., coefficient; CT, computed tomography; MRI, magnetic resonance imaging ; mRS, modified Rankin Scale; PC-APSECTS, posterior circulation Alberta stroke program early CT score; REML, Restricted maximum likelihood; SE, standard error; UFO, unfavorable function outcome
