# Supplementary material for: Posterior circulation acute stroke prognosis early CT scores in predicting functional outcomes: A meta-analysis
Source: PubMed Central journal article supplement (PMC7886215; doi:10.1371/journal.pone.0246906), 2021-02-16
Supplement: pone.0246906.s011.pdf [file pone.0246906.s011.pdf]

**S4 Table. Significant test for effect size for each cut-off of PC-ASPECTS**

| <b>Cut-off point</b> | <b>z-score</b> | <b>Raw <i>P</i> value</b> | <b>Stepdown<br/>Bonferroni <i>P</i> value</b> | <b>Hochberg<br/>adjustment</b> |
|----------------------|----------------|---------------------------|-----------------------------------------------|--------------------------------|
| PC-ASPECTS $\leq 6$  | 2.45           | 0.0140                    | 0.0210                                        | 0.0140                         |
| PC-ASPECTS $\leq 7$  | 3.94           | <0.0001                   | < 0.0001                                      | <0.0001                        |
| PC-ASPECTS $\leq 8$  | 2.72           | 0.0070                    | 0.0210                                        | 0.0140                         |
| PC-ASPECTS $\leq 9$  | 2.72           | 0.0070                    | 0.0210                                        | 0.0140                         |

PC-APSECTS, posterior circulation Alberta stroke program early CT score
