# Supplementary material for: Posterior circulation acute stroke prognosis early CT scores in predicting functional outcomes: A meta-analysis
Source: PubMed Central journal article supplement (PMC7886215; doi:10.1371/journal.pone.0246906), 2021-02-16
Supplement: pone.0246906.s012.pdf [file pone.0246906.s012.pdf]

The codes were listed in the following.

**\*SMD part\***

```
label var mean1 "Unfavorable "
```

```
label var mean2 "Favorable "
```

```
metan n1 mean1 sd1 n2 mean2 sd2, lcols(Author Year mean1 mean2) textsize(150) xlabel (-1.5,-1,-0.5,0,0.5,1,1.5) ///
```

```
title("PC-ASPECTS score difference between unfavorable and favorable outcome groups")
```

**\*CT vs MRI\***

```
metan n1 mean1 sd1 n2 mean2 sd2, lcols(Author Year mean1 mean2) textsize(120)
```

```
by(imaging_modality) ///
```

```
xlabel (-1.5,-1,-0.5,0,0.5,1,1.5) ///
```

```
title("PC-ASPECTS score difference between unfavorable and favorable outcome groups")
```

**\*mRS 2 vs 3\***

```
metan n1 mean1 sd1 n2 mean2 sd2, lcols(Author Year mean1 mean2) textsize(120) by(mRS)
```

```
xlabel (-1.5,-1,-0.5,0,0.5,1,1.5) ///
```

```
title("PC-ASPECTS score difference between unfavorable and favorable outcome groups")
```

**\*OR part\***

```
gen score = ""
```

```
replace score = "9" if PCASPECTS==9
```

```
replace score = "8" if PCASPECTS==8
```

```
replace score = "7" if PCASPECTS==7
```

```
replace score = "6" if PCASPECTS==6
```

```
assert score != ""
```

```
label var score "PC-ASPECTS"
```

```
tab score
```

```
gen lnOR = ln(OR)
```

```
gen lnORLL = ln(ORLL)
```

```
gen lnORUL = ln(ORUL)
```

```
generate se = (ORUL - ORLL) / (2*invnormal(0.975))
```

```
generate lnse = (lnORUL - lnORLL) / (2*invnormal(0.975))
```

```
generate varlnse = lnse^2
```

```
generate period = PCASPECTS
```

```
generate OR2 = exp(lnOR)
```

```
label define PCASPECTSlab 6 "PCASPECTS<=6" 7 "PCASPECTS<=7" 8 "PCASPECTS<=8" 9
```

```
"PCASPECTS<=9" , replace
```

```
label values PCASPECTS PCASPECTSlab
```

```
tab PCASPECTS
```

\*Metan: meta-analysis command\*

```
sort PCASPECTS Year
metan lnOR lnORLL lnORUL, random lcols(Author Year) eform effect(OR) by(PCASPECTS)
label(namevar=PCASPECTS) ///
xlabel(0.1,0.2,0.5,1,2,5,10) ///
title("Unfavorable outcomes prediction by binary PC-ASPECTS") ///
boxsca(50) xsize(10) ysize(8)
```

\*Metan: CT vs MRI\*

```
sort PCASPECTS Year
metan lnOR lnORLL lnORUL, random lcols(Author Year) eform effect(OR)
by(imaging_modality) label(namevar=PCASPECTS) ///
xlabel(0.1,0.2,0.5,1,2,5,10) textsize(150) ///
title("Unfavorable outcomes prediction by binary PC-ASPECTS") ///
boxsca(50) xsize(10) ysize(8)
```

\*Metan: mRS 2 vs 3\*

```
metan lnOR lnORLL lnORUL, random lcols(Author Year) eform effect(OR) by(mRS)
label(namevar=PCASPECTS) ///
xlabel(0.1,0.2,0.5,1,2,5,10) ///
textsize(150) title("Unfavorable outcomes prediction by binary PC-ASPECTS") ///
boxsca(50) xsize(10) ysize(8)
```

\*Metafunnel\*

```
metafunnel lnOR lnInse, xtitle(Log Odds Ratio) subtitle() ///
ytitle(Standard error of Log Odds Ratio) by(PCASPECTS)
```

\*OR par score change\*

```
gen lnOR = ln(OR)
gen lnORLL = ln(ORLL)
gen lnORUL = ln(ORUL)
generate lnse = (lnORUL - lnORLL) / (2*invnormal(0.975))
generate varlnse = lnse^2
```

```
metan lnOR lnORLL lnORUL, random lcols(Author Year) eform effect(OR) noseclub ///
xlabel(0.1,0.2,0.5,1,2,5,10) textsize(150) title("Unfavorable outcome prediction by PC-
ASPECTS per score decrease") ///
boxsca(50) xsize(10) ysize(8)
```

```
metan lnOR lnORLL lnORUL, random lcols(Author Year) eform effect(OR)
by(imaging_modality) noseclub ///
```

```
xlabel(0.1,0.2,0.5,1,2,5,10) textsize(150) title("Unfavorable outcome prediction by PC-  
ASPECTS per score decrease") ///  
boxsca(50) xsize(10) ysize(8)
```

```
metan lnOR lnORLL lnORUL, random lcols(Author Year) eform effect(OR) by(mRS) noseclub  
///  
xlabel(0.1,0.2,0.5,1,2,5,10) textsize(150) title("Unfavorable outcome prediction by PC-  
ASPECTS per score decrease") ///  
boxsca(50) xsize(10) ysize(8)
```

```
*metafunnel
```

```
metafunnel lnOR lnSE, xtitle(Log odds ratio) ytitle(Standard error of log OR)  
confunnel lnOR lnSE
```

```
*metabias
```

```
metabias lnOR lnSE, begg
```
